# Supplementary material
Source: Springer Nature journal article supplement (https://www.springermedizin.de/resource/supplementary/13063_2009_387_MOESM1_ESM.pdf/9618120)
Supplement: MOESM1 [file 9618120]

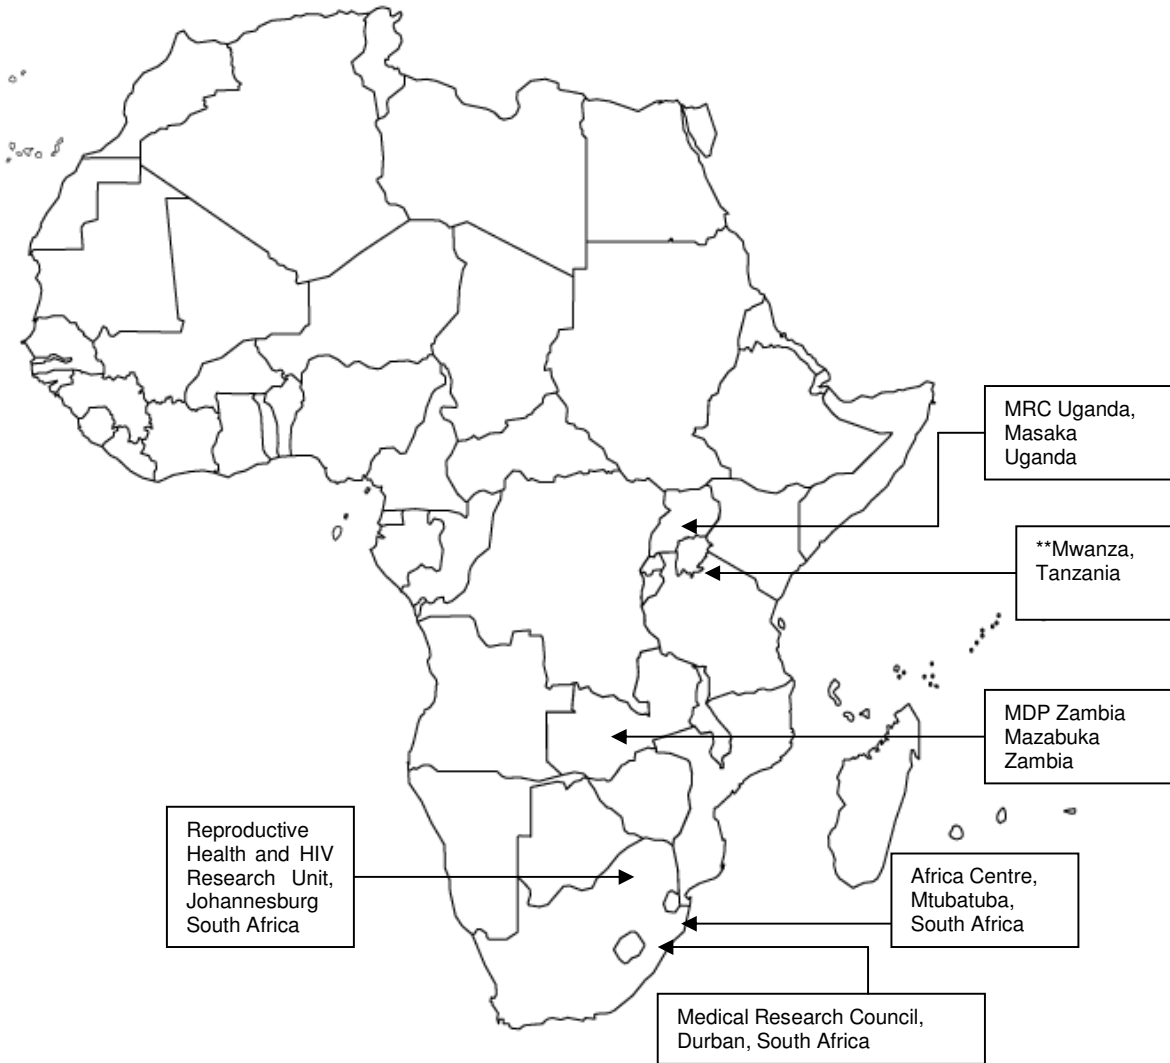

*\*\*London School of Hygiene and Tropical Medicine (LSHTM), African Medical and Research Foundation (AMREF) and National Institute for Medical Research (NIMR) Collaborative Research Projects*
